# Supplementary material
Source: PubMed Central journal article supplement (PMC10717492)
Supplement: 12576_2013_257_MOESM1_ESM.pdf [file 12576_2013_257_MOESM1_ESM.pdf]

**Supplement.** Location of seven VEGFA promoter SNPs and haplotypes of alleles contained in TFBS. (+/-) is the DNA strand location of the TFBS. TSS denotes the base pair distance from the transcriptional start site. TFBS in **bold** are only present for the given allele.

| Haplotypes | TSS                                                                                                            | (-)2578bp                                                                                                                                                                                                                                 | (-)2548bp                                                        | (-)1203                                                                  | (-)1190bp                                 | (-)1179                                                             | (-)1154bp                                                          | (-)634BP  | Study group haplotype frequency |       |       |     |
|------------|----------------------------------------------------------------------------------------------------------------|-------------------------------------------------------------------------------------------------------------------------------------------------------------------------------------------------------------------------------------------|------------------------------------------------------------------|--------------------------------------------------------------------------|-------------------------------------------|---------------------------------------------------------------------|--------------------------------------------------------------------|-----------|---------------------------------|-------|-------|-----|
|            | SNP                                                                                                            | rs699947                                                                                                                                                                                                                                  | rs34357231<br>rs35569394                                         | rs79469752                                                               | rs13207351                                | rs28357093                                                          | rs1570360                                                          | rs2010963 | Han                             | AMS   | NT    | CMS |
| 1          | C                                                                                                              | D                                                                                                                                                                                                                                         | C                                                                | G                                                                        | A                                         | G                                                                   | C                                                                  | 0.341     | 0.307                           | 0.441 | 0.483 |     |
|            | GATA2 (+)<br><b>GATA3 (-)</b><br><b>HIF1A:ARNT (-)</b><br><b>TAL1:TCF3 (+)</b><br>Tcfcp2l1 (-)<br>Tcfcp2l1 (+) | AP1 (+)<br>CREB1 (-)<br><b>NFIC (+)</b><br><b>NR4A2 (-)</b><br>RUNX1 (-)<br>TFAP2A (+)<br>Zfx (-)                                                                                                                                         | Bsap (-)<br><b>NFIC (-)</b><br>Pax5 (-)<br>TFAP2A (-)<br>Zfx (+) | <b>NFIC (+)</b><br><b>Tcfcp2l1 (-)</b><br><b>Tcfcp2l1 (+)</b><br>Zfx (-) | <b>RUNX1</b><br><b>Zfx (-)</b><br>Zfx (+) | <b>Klf4 (+)</b><br><b>MZF1_1-5-13 (+)</b><br>SP1 (-)<br>ZNF354C (-) | <b>GABPA (+)</b><br><b>IRF2 (+)</b><br><b>IRF1 (+)</b><br>Pax2 (-) |           |                                 |       |       |     |
| 2          | C                                                                                                              | D                                                                                                                                                                                                                                         | C                                                                | G                                                                        | A                                         | G                                                                   | G                                                                  | 0.218     | 0.148                           | 0.18  | 0.138 |     |
|            |                                                                                                                |                                                                                                                                                                                                                                           |                                                                  |                                                                          |                                           |                                                                     | Pax2 (-)<br><b>SP1 (-)</b><br><b>SP1 (-)</b>                       |           |                                 |       |       |     |
| 3          | A                                                                                                              | I                                                                                                                                                                                                                                         | C                                                                | A                                                                        | A                                         | A                                                                   | G                                                                  | 0.176     | 0.113                           | 0.079 | 0.114 |     |
|            | GATA2 (+)<br><b>NFIC (-)</b><br>Tcfcp2l1 (-)<br>Tcfcp2l1 (+)                                                   | AP1 (+)<br>CREB1 (-)<br><b>ETS1 (+)</b><br><b>GATA3 (-)</b><br><b>MZF1_1-4 (-)</b><br><b>NFATC2 (+)</b><br><b>Nkx3-2 (-)</b><br><b>RUNX1 (-)</b><br>RUNX1 (-)<br><b>SP1 (+)</b><br><b>SPL1 (-)</b><br>TFAP2A (-)<br>TFAP2A (+)<br>Zfx (-) |                                                                  | <b>MIZF (+)</b><br><b>Nkx3-2 (-)</b><br>Zfx (-)                          |                                           | <b>ETS1 (-)</b><br>SP1 (-)<br><b>SPIB (+)</b><br>ZNF354C (-)        |                                                                    |           |                                 |       |       |     |
| 4          | C                                                                                                              | D                                                                                                                                                                                                                                         | C                                                                | A                                                                        | A                                         | G                                                                   | C                                                                  |           | 0.037                           | 0.057 | 0.029 |     |
| 5          | A                                                                                                              | I                                                                                                                                                                                                                                         | C                                                                | A                                                                        | A                                         | G                                                                   | G                                                                  | 0.088     | 0.05                            | 0.055 | 0.081 |     |

|    |   |   |                                                                                                                                                                                                                                      |   |                              |   |   |       |       |       |
|----|---|---|--------------------------------------------------------------------------------------------------------------------------------------------------------------------------------------------------------------------------------------|---|------------------------------|---|---|-------|-------|-------|
| 6  | C | D | C                                                                                                                                                                                                                                    | G | C                            | G | C |       |       | 0.043 |
|    |   |   |                                                                                                                                                                                                                                      |   | <b>TFAP2A (-)</b><br>Zfx (+) |   |   |       |       |       |
|    | C | D | C                                                                                                                                                                                                                                    | G | C                            | G | G | 0.096 | 0.082 | 0.035 |
| 7  | A | I | C                                                                                                                                                                                                                                    | G | A                            | G | G | 0.021 |       | 0.042 |
| 8  | C | D | C                                                                                                                                                                                                                                    | A | A                            | A | C |       |       | 0.041 |
| 9  | A | I | C                                                                                                                                                                                                                                    | A | A                            | G | C |       |       | 0.022 |
| 10 | C | D | T                                                                                                                                                                                                                                    | A | A                            | G | G |       |       | 0.022 |
|    |   |   | <b>Bsap (-)</b><br><b>CFI-USP (+)</b><br><b>Coup-TF (-)</b><br><b>ESR2 (+)</b><br><b>Hand1:Tcf2a (+)</b><br><b>NFE2L1:MafG (-)</b><br><b>Pax2 (+)</b><br><b>Pax5 (-)</b><br><b>Pax6 (-)</b><br><b>TFAP2A (-)</b><br><b>Hand1 (+)</b> |   |                              |   |   |       |       |       |
| 11 | C | D | T                                                                                                                                                                                                                                    | A | C                            | G | G |       |       | 0.018 |
| 12 | C | D | T                                                                                                                                                                                                                                    | G | C                            | G | G | 0.017 | 0.019 | 0.065 |
| 13 | C | D | C                                                                                                                                                                                                                                    | A | A                            | G | G | 0.013 | 0.02  | 0.027 |
| 14 | A | I | C                                                                                                                                                                                                                                    | A | A                            | A | C | 0.012 |       |       |
| 15 | A | I | T                                                                                                                                                                                                                                    | G | C                            | G | G | 0.01  | 0.014 |       |
| 16 | A | I | T                                                                                                                                                                                                                                    | A | C                            | A | G |       | 0.022 | 0.014 |
| 17 | A | I | C                                                                                                                                                                                                                                    | G | A                            | G | G |       | 0.014 | 0.012 |
| 18 | C | D | C                                                                                                                                                                                                                                    | A | C                            | G | C |       | 0.018 |       |

|              |   |   |   |   |   |   |    |       |    |    |
|--------------|---|---|---|---|---|---|----|-------|----|----|
| 19           | C | D | C | G | A | A | G  | 0.015 |    |    |
| 20           | C | D | C | A | A | A | G  | 0.014 |    |    |
| 21           | C | D | T | G | C | G | C  | 0.013 |    |    |
| 22           | A | I | T | A | C | A | C  | 0.012 |    |    |
| Total number |   |   |   |   |   |   | 10 | 16    | 11 | 10 |

**TFBS information:**

**TF discription**

|              |                                                          |                                                                                                                                                                                                                                                                                         |
|--------------|----------------------------------------------------------|-----------------------------------------------------------------------------------------------------------------------------------------------------------------------------------------------------------------------------------------------------------------------------------------|
| AP-1         | Activator protein 1                                      | Transcription factor which is a heterodimeric protein composed of proteins belonging to the c-Fos, c-Jun, ATF and JDP families.                                                                                                                                                         |
| Bsap         | B-cell activator protein                                 | B-cell-specific transcription factor, regulation of the CD19 gene.                                                                                                                                                                                                                      |
| CFI-USP      | complement component I ubiquitin specific peptidase      | Essential for regulating the complement cascade.<br>Hydrolase that deubiquitinates polyubiquitinated target proteins                                                                                                                                                                    |
| Coup (NR2F1) | chicken ovalbumin upstream promoter-transcription factor | Binds to the ovalbumin promoter and, in conjunction with another protein (S300-II) stimulates initiation of transcription. Binds to both direct repeats and palindromes of the 5'-AGGTCA-3' motif.                                                                                      |
| CREB1        | cAMP responsive element binding protein                  | Transcription factor that is a member of the leucine zipper family of DNA binding proteins and binds as a homodimer to the cAMP-responsive element, an octameric palindrome.                                                                                                            |
| En1          | Homeobox protein engrailed-1                             | Homeobox-containing genes are thought to have a role in controlling development.                                                                                                                                                                                                        |
| ESR2         | Estrogen receptor beta                                   | Estrogen receptor $\beta$ is a member of the family of estrogen receptors and the superfamily of nuclear receptor transcription factors and is expressed by many tissues including blood monocytes and tissue macrophages, colonic and pulmonary epithelial cells.                      |
| ETS1         | Protein C-ets-1                                          | The protein encoded by this gene belongs to the ETS family of transcription factors and has been shown to interact with TTRAP, UBE2I and Death associated protein.                                                                                                                      |
| GABPA        | GA-binding protein alpha chain                           | One of three GA-binding protein transcription factor subunits which functions as a DNA-binding subunit which shares identity with a subunit encoding the nuclear respiratory factor 2 gene and is likely involved in activation of cytochrome oxidase expression and nuclear control of |

|             |                                                                                   |                                                                                                                                                                                                                                                                                                                                                                                                 |
|-------------|-----------------------------------------------------------------------------------|-------------------------------------------------------------------------------------------------------------------------------------------------------------------------------------------------------------------------------------------------------------------------------------------------------------------------------------------------------------------------------------------------|
|             |                                                                                   | mitochondrial function.                                                                                                                                                                                                                                                                                                                                                                         |
| GATA2       | GATA binding protein 2                                                            | A member of the GATA family of zinc-finger transcription factors that are named for the consensus nucleotide sequence they bind in the promoter regions of target genes and play an essential role in regulating transcription of genes involved in the development and proliferation of hematopoietic and endocrine cell lineages.                                                             |
| GATA3       | GATA binding protein 3                                                            | Plays an important role in endothelial cell biology.                                                                                                                                                                                                                                                                                                                                            |
| Hand1:Tcf2a | Heart- and neural crest derivatives-expressed protein 1: transcription factor E2A | Hand1 belongs to the basic helix-loop-helix family of transcription factors. The Tcf2a gene encodes the transcription factor E2A, a member of the "class I" a family of basic helix-loop-helix (bHLH) transcription factors (also known simply as "E-proteins"). The transcription factor E2A controls the initiation of B lymphopoiesis.                                                       |
| HIF1A:ARNT  | Hypoxia-inducible factor 1:Aryl hydrocarbon receptor nuclear translocator         | HIF1 is a homodimeric basic helix-loop-helix structure composed of HIF1a, the alpha subunit, and the aryl hydrocarbon receptor nuclear translocator (Arnt), the beta subunit. The protein encoded by HIF1 is a Per-Arnt-Sim (PAS) transcription factor found in mammalian cells growing at low oxygen concentrations. It plays an essential role in cellular and systemic responses to hypoxia. |
| IRF1,2      | Interferon regulatory factor                                                      | Members of the interferon regulatory transcription factor (IRF) family that contain a conserved N-terminal region of about 120 amino acids, which folds into a structure that binds specifically to the interferon consensus sequence (ICS).                                                                                                                                                    |
| Klf4        | Krueppel-like factor 4                                                            | Transcription factor that can act both as activator and as repressor. Regulates the expression of key transcription factors during embryonic development.                                                                                                                                                                                                                                       |
| MIZF        | Histone H4 transcription factor                                                   | MIZF interacts with methyl-CpG-binding protein-2 and plays a role in DNA methylation and transcription repression.                                                                                                                                                                                                                                                                              |
| MZF1_1-5-13 | Myeloid zinc finger 1                                                             | Binds to target promoter DNA and functions as transcription regulator.<br>May be one regulator of transcriptional events during hemopoietic development.<br>Isoforms of this protein have been shown to exist at protein level.                                                                                                                                                                 |
| NFATC2      | Nuclear factor of activated T-cells, cytoplasmic 2                                | This protein is present in the cytosol and only translocates to the nucleus upon T cell receptor (TCR) stimulation, where it becomes a member of the nuclear factors of activated T cells transcription complex.                                                                                                                                                                                |
| NFIC        | Nuclear factor 1 C-type                                                           | Recognizes and binds the palindromic sequence 5'-TTGGCNNNNNGCCAA-3' present in viral and cellular promoters and in the origin of replication of adenovirus type 2. These proteins are individually capable                                                                                                                                                                                      |

of activating transcription and replication.

|             |                                                                          |                                                                                                                                                                                                                                                                                                                                                 |
|-------------|--------------------------------------------------------------------------|-------------------------------------------------------------------------------------------------------------------------------------------------------------------------------------------------------------------------------------------------------------------------------------------------------------------------------------------------|
| NFE2L1:MafG | Nuclear factor erythroid 2-related factor 1<br>Transcription factor MafG | Nuclear factor erythroid 2-related factor (Nrf2) coordinates the up-regulation of cytoprotective genes via the antioxidant response element (ARE). MafG is a ubiquitously expressed small maf protein that is involved in cell differentiation of erythrocytes. It dimerizes with P45 NF-E2 protein and activates expression of a and b-globin. |
| Nkx3-2      | Natural killer 3 homeobox 2                                              | This gene encodes a member of the NK family of homeobox-containing proteins.<br>Transcriptional repressor that acts as a negative regulator of chondrocyte maturation.                                                                                                                                                                          |
| NR4A2       | Nuclear receptor subfamily 4, group A, member 2                          | Transcriptional regulator which is important for the differentiation and maintenance of meso-diencephalic dopaminergic (mdDA) neurons during development.                                                                                                                                                                                       |
| Pax         | Paired box gene                                                          | The central feature of this transcription factor gene family is the conserved DNA-binding paired box domain. Alternative splicing of this gene results in multiple transcript variants.                                                                                                                                                         |
| RUNX1       | Runt-related transcription factor 1                                      | Heterodimeric transcription factor that binds to the core element of many enhancers and promoters. The protein encoded by this gene represents the alpha subunit of CBF and is thought to be involved in the development.                                                                                                                       |
| SP1         | Specificity Protein 1                                                    | Can activate or repress transcription in response to physiological and pathological stimuli. Regulates the expression of a large number of genes involved in a variety of processes such as cell growth, apoptosis, differentiation and immune responses.                                                                                       |
| SPIB        | Transcription factor Spi-B                                               | SPI1 and SPIB are members of a subfamily of ETS transcription factors.<br>ETS proteins share a conserved ETS domain that mediates specific DNA binding.<br>SPIB and SPI1 bind to a purine-rich sequence, the PU box (5-prime-GAGGAA-3-).                                                                                                        |
| SPL1        | Squamosa promoter-binding-like protein 1                                 | A member of SPL gene family, encodes DNA binding proteins and putative transcription factors.                                                                                                                                                                                                                                                   |
| TAL1:TCF3   | T-cell acute lymphocytic leukemia 1:<br>Transcription factor 3           | Implicated in the genesis of hemopoietic malignancies. It may play an important role in hemopoietic differentiation. Serves as a positive regulator of erythroid differentiation.<br>TCF3 has been shown to directly enhance Hes1 (a well-known target of Notch signaling) expression.                                                          |
| Tcfcp2l1    | Transcription factor CP2-like 1                                          | Transcriptional suppressor. May suppress UBP1-mediated transcriptional activation. Modulates the placental expression of CYP11A1.                                                                                                                                                                                                               |
| TFAP2a      | Activator protein 2                                                      | The AP2a protein acts as a sequence specific DNA-binding transcription factor recognizing and binding to the specific DNA sequence and recruiting transcription machinery.                                                                                                                                                                      |

|         |                                   |                                                                                                       |
|---------|-----------------------------------|-------------------------------------------------------------------------------------------------------|
| ZFX     | Zinc finger X-chromosomal protein | A member of the krueppel C2H2-type zinc-finger protein family and probable transcriptional activator. |
| ZNF354C | Zinc finger protein 354C          | May function as a transcription repressor.                                                            |
